# Supplementary material for: An estimate of pediatric lives saved due to non-pharmacologic interventions during the early COVID-19 pandemic
Source: bioRxiv or medRxiv preprint supplement (doi:10.1101/2023.04.18.23288763), 2023-04-20

Faust *et al.* An estimate of pediatric lives saved due to non-pharmacologic interventions during the early COVID-19 pandemic.

### **Supplemental Exhibits List**

Figure 1. Monthly expected and observed deaths, all, medical and external causes, Ages 0-9 years, 3- and 4-year baseline periods for modeling, January 2015-February 2022.

Table 1. Excess deaths, all, medical and external causes, and COVID-19 deaths, March 2020-February 2022, modeled using 4-year baseline period.

Table 2. Excess deaths, all, medical and external causes, and COVID-19 deaths, March 2020-February 2022, modeled using 3-year baseline period.

Figure 2. Monthly expected and observed deaths, all, medical and external causes, Ages 0-9 years, January 2015-February 2022.

Figure 3. Monthly expected and observed deaths, all, medical and external causes, Ages <1, 1-4, 5-9 years, January 2015-February 2022.

Table 3. Excess deaths, all, medical and external causes, by month, Ages < 1 years, March 2020-February 2022.

Table 4. Excess deaths, all, medical and external causes, by month, Ages 1-4 years, March 2020-February 2022.

Table 5. Excess deaths, all, medical and external causes, by month, Ages 5-9 years, March 2020-February 2022.

Figure 4. Deaths by ICD-10 chapter, 12-month periods beginning each March, ages <1 years, March 2010-February 2022.

Figure 5. Deaths by ICD-10 chapter, 12-month periods beginning each March, ages 1-9 years, March 2010-February 2022.

Figure 6. Deaths from external causes by ICD-10 Sub-chapter, ages 0-9 years, March 2010-February 2022 (select causes not shown due to suppression constraints).

# Supplemental Figure 1

## Expected and Observed Deaths: 0-9 Years

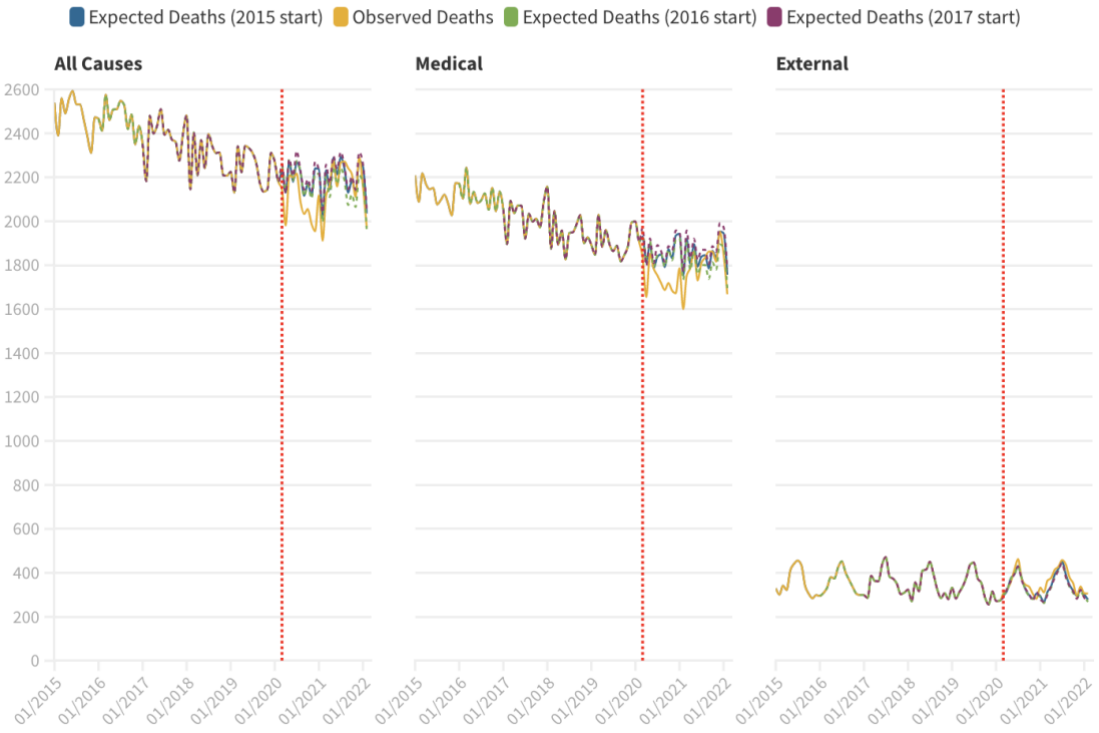

## Supplemental Table 1

| Period                   | Field                              | < 1 years            | 1-4 years           | 5-9 years           | 1-9 years            | 0-9 years             |
|--------------------------|------------------------------------|----------------------|---------------------|---------------------|----------------------|-----------------------|
| March 2020-February 2021 | All Causes                         | -936 (-1360 to -512) | -187 (-366 to -8)   | -146 (-227 to -65)  | -334 (-542 to -126)  | -1270 (-3808 to 1268) |
| March 2020-February 2021 | Medical                            | -913 (-1315 to -511) | -374 (-573 to -176) | -195 (-257 to -134) | -570 (-784 to -356)  | -1483 (-1977 to -989) |
| March 2020-February 2021 | External                           | -23 (-120 to 74)     | 187 (121 to 253)    | 49 (-21 to 119)     | 236 (152 to 319)     | 213 (100 to 327)      |
| March 2020-February 2021 | COVID UCD (MCD) Deaths             | 44 (69)              | 25 (32)             | 24 (38)             | 49 (70)              | 93 (139)              |
| March 2020-February 2021 | All Causes Observed/Expected Ratio | 0.95                 | 0.95                | 0.94                | 0.94                 | 0.95                  |
| March 2020-February 2021 | Medical Observed/Expected Ratio    | 0.95                 | 0.83                | 0.86                | 0.84                 | 0.93                  |
| March 2020-February 2021 | External Observed/Expected Ratio   | 0.99                 | 1.13                | 1.05                | 1.1                  | 1.05                  |
| March 2021-February 2022 | All Causes                         | 252 (-165 to 669)    | 105 (-71 to 281)    | 115 (36 to 194)     | 220 (16 to 424)      | 472 (-2082 to 3026)   |
| March 2021-February 2022 | Medical                            | 129 (-267 to 525)    | -15 (-213 to 183)   | -33 (-93 to 26)     | -48 (-259 to 163)    | 81 (-405 to 566)      |
| March 2021-February 2022 | External                           | 123 (27 to 218)      | 120 (54 to 185)     | 148 (80 to 217)     | 268 (185 to 351)     | 391 (280 to 502)      |
| March 2021-February 2022 | COVID UCD (MCD) Deaths             | 139 (242)            | 75 (107)            | 82 (99)             | 157 (206)            | 296 (448)             |
| March 2021-February 2022 | All Causes Observed/Expected Ratio | 1.01                 | 1.03                | 1.05                | 1.04                 | 1.02                  |
| March 2021-February 2022 | Medical Observed/Expected Ratio    | 1.01                 | 0.99                | 0.98                | 0.99                 | 1                     |
| March 2021-February 2022 | External Observed/Expected Ratio   | 1.08                 | 1.08                | 1.16                | 1.11                 | 1.1                   |
| Pandemic period          | All Causes                         | -684 (-1292 to -76)  | -82 (-398 to 234)   | -32 (-176 to 112)   | -114 (-435 to 207)   | -798 (-8315 to 6719)  |
| Pandemic period          | Medical                            | -784 (-1361 to -207) | -389 (-753 to -26)  | -229 (-326 to -132) | -618 (-1005 to -231) | -1402 (-2110 to -694) |
| Pandemic period          | External                           | 100 (-39 to 239)     | 307 (185 to 429)    | 197 (66 to 328)     | 504 (350 to 659)     | 604 (401 to 808)      |
| Pandemic period          | COVID UCD (MCD) Deaths             | 183 (311)            | 100 (139)           | 106 (137)           | 206 (276)            | 389 (587)             |
| Pandemic period          | All Causes Observed/Expected Ratio | 0.98                 | 0.99                | 0.99                | 0.99                 | 0.98                  |
| Pandemic period          | Medical Observed/Expected Ratio    | 0.98                 | 0.91                | 0.92                | 0.91                 | 0.97                  |
| Pandemic period          | External Observed/Expected Ratio   | 1.03                 | 1.1                 | 1.11                | 1.1                  | 1.08                  |

## Supplemental Table 2

| Period                   | Field                              | < 1 years              | 1-4 years           | 5-9 years           | 1-9 years           | 0-9 years              |
|--------------------------|------------------------------------|------------------------|---------------------|---------------------|---------------------|------------------------|
| March 2020-February 2021 | All Causes                         | -1219 (-1662 to -776)  | -172 (-331 to -13)  | -156 (-219 to -93)  | -329 (-576 to -82)  | -1548 (-1994 to -1102) |
| March 2020-February 2021 | Medical                            | -1182 (-1596 to -768)  | -277 (-369 to -185) | -213 (-286 to -140) | -490 (-644 to -336) | -1672 (-2164 to -1180) |
| March 2020-February 2021 | External                           | -37 (-132 to 58)       | 105 (34 to 175)     | 57 (-11 to 124)     | 161 (42 to 281)     | 124 (8 to 240)         |
| March 2020-February 2021 | COVID UCD (MCD) Deaths             | 44 (69)                | 25 (32)             | 24 (38)             | 49 (70)             | 93 (139)               |
| March 2020-February 2021 | All Causes Observed/Expected Ratio | 0.94                   | 0.95                | 0.93                | 0.94                | 0.94                   |
| March 2020-February 2021 | Medical Observed/Expected Ratio    | 0.94                   | 0.87                | 0.85                | 0.86                | 0.93                   |
| March 2020-February 2021 | External Observed/Expected Ratio   | 0.98                   | 1.07                | 1.06                | 1.07                | 1.03                   |
| March 2021-February 2022 | All Causes                         | -621 (-1057 to -185)   | 190 (34 to 346)     | 116 (54 to 178)     | 306 (63 to 549)     | -316 (-755 to 123)     |
| March 2021-February 2022 | Medical                            | -710 (-1117 to -303)   | 243 (152 to 333)    | -34 (-105 to 37)    | 209 (57 to 360)     | -501 (-985 to -17)     |
| March 2021-February 2022 | External                           | 89 (-5 to 182)         | -53 (-123 to 17)    | 150 (83 to 216)     | 97 (-21 to 214)     | 185 (72 to 299)        |
| March 2021-February 2022 | COVID UCD (MCD) Deaths             | 139 (242)              | 75 (107)            | 82 (99)             | 157 (206)           | 296 (448)              |
| March 2021-February 2022 | All Causes Observed/Expected Ratio | 0.97                   | 1.05                | 1.05                | 1.05                | 0.99                   |
| March 2021-February 2022 | Medical Observed/Expected Ratio    | 0.96                   | 1.13                | 0.98                | 1.06                | 0.98                   |
| March 2021-February 2022 | External Observed/Expected Ratio   | 1.06                   | 0.97                | 1.16                | 1.04                | 1.04                   |
| Pandemic period          | All Causes                         | -1841 (-2477 to -1205) | 18 (-239 to 275)    | -41 (-172 to 90)    | -23 (-454 to 408)   | -1864 (-2581 to -1147) |
| Pandemic period          | Medical                            | -1892 (-2485 to -1298) | -34 (-177 to 108)   | -247 (-404 to -90)  | -281 (-534 to -29)  | -2173 (-2879 to -1467) |
| Pandemic period          | External                           | 51 (-85 to 187)        | 52 (-103 to 207)    | 206 (55 to 358)     | 258 (51 to 465)     | 309 (104 to 515)       |
| Pandemic period          | COVID UCD (MCD) Deaths             | 183 (311)              | 100 (139)           | 106 (137)           | 206 (276)           | 389 (587)              |
| Pandemic period          | All Causes Observed/Expected Ratio | 0.96                   | 1                   | 0.99                | 1                   | 0.96                   |
| Pandemic period          | Medical Observed/Expected Ratio    | 0.95                   | 0.99                | 0.91                | 0.96                | 0.95                   |
| Pandemic period          | External Observed/Expected Ratio   | 1.02                   | 1.02                | 1.11                | 1.05                | 1.04                   |

## Supplemental Figure 2

### Expected and Observed Deaths: 0-9 Years

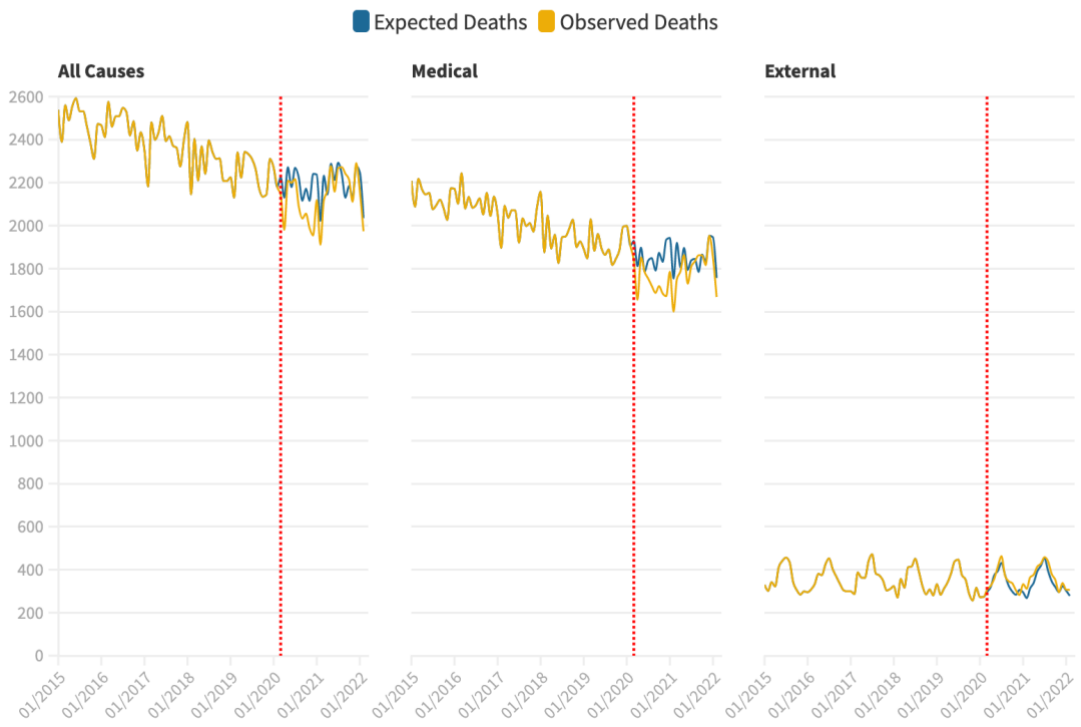

# Supplemental Figure 3

## Expected and Observed Deaths: 0-9 Years

Expected Deaths Observed Deaths

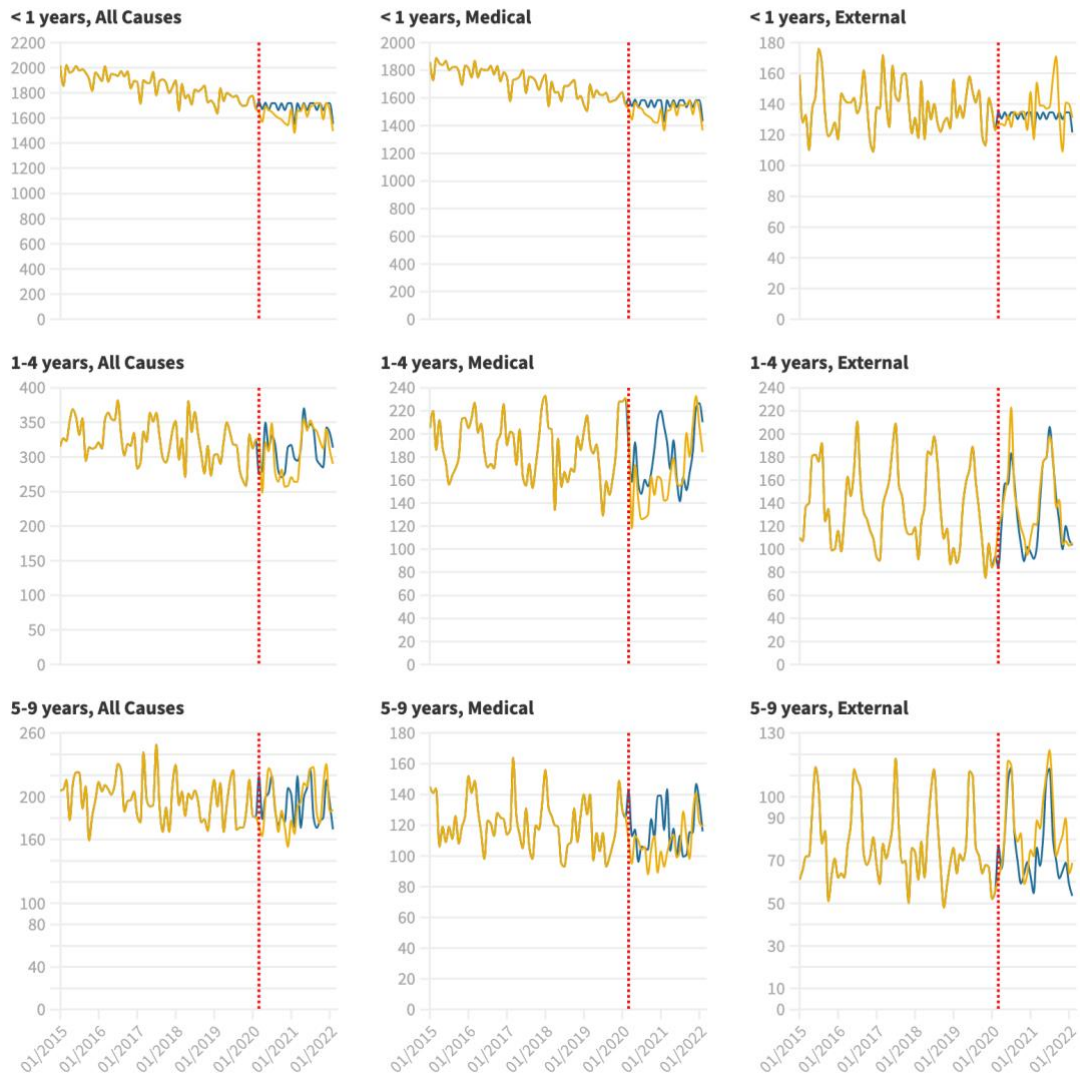

### Supplemental Table 3

| Month  | Age group | Excess Deaths (95% CI) |                   |                | Ratio of Observed/Expected (95% CI) |                    |                    |
|--------|-----------|------------------------|-------------------|----------------|-------------------------------------|--------------------|--------------------|
|        |           | All Causes             | Medical           | External       | All Causes                          | Medical            | External           |
| 202003 | < 1 years | -85 (-166 - -3)        | -77 (-159 - 6)    | -8 (-29 - 13)  | 0.95 (0.91 - 1.00)                  | 0.95 (0.90 - 1.00) | 0.94 (0.81 - 1.12) |
| 202004 | < 1 years | -102 (-183 - -21)      | -98 (-181 - -16)  | -3 (-25 - 18)  | 0.94 (0.90 - 0.99)                  | 0.94 (0.89 - 0.99) | 0.97 (0.84 - 1.16) |
| 202005 | < 1 years | -30 (-113 - 52)        | -22 (-106 - 62)   | -9 (-30 - 13)  | 0.98 (0.94 - 1.03)                  | 0.99 (0.94 - 1.04) | 0.94 (0.81 - 1.11) |
| 202006 | < 1 years | 1 (-81 - 84)           | -1 (-85 - 82)     | 3 (-19 - 24)   | 1.00 (0.95 - 1.05)                  | 1.00 (0.95 - 1.06) | 1.02 (0.88 - 1.22) |
| 202007 | < 1 years | -69 (-149 - 11)        | -59 (-141 - 22)   | -10 (-30 - 11) | 0.96 (0.92 - 1.01)                  | 0.96 (0.92 - 1.01) | 0.93 (0.80 - 1.10) |
| 202008 | < 1 years | -97 (-179 - -15)       | -98 (-180 - -15)  | 0 (-21 - 22)   | 0.94 (0.90 - 0.99)                  | 0.94 (0.89 - 0.99) | 1.00 (0.87 - 1.19) |
| 202009 | < 1 years | -61 (-142 - 20)        | -63 (-146 - 19)   | 3 (-18 - 24)   | 0.96 (0.92 - 1.01)                  | 0.96 (0.91 - 1.01) | 1.02 (0.88 - 1.22) |
| 202010 | < 1 years | -131 (-214 - -48)      | -132 (-216 - -47) | 0 (-21 - 22)   | 0.92 (0.88 - 0.97)                  | 0.92 (0.87 - 0.97) | 1.00 (0.86 - 1.20) |
| 202011 | < 1 years | -104 (-186 - -22)      | -109 (-192 - -25) | 5 (-17 - 26)   | 0.94 (0.89 - 0.99)                  | 0.93 (0.88 - 0.98) | 1.04 (0.89 - 1.24) |
| 202012 | < 1 years | -175 (-258 - -92)      | -164 (-248 - -79) | -12 (-33 - 10) | 0.90 (0.86 - 0.94)                  | 0.90 (0.85 - 0.95) | 0.91 (0.79 - 1.09) |
| 202101 | < 1 years | -48 (-129 - 33)        | -62 (-144 - 20)   | 13 (-8 - 35)   | 0.97 (0.93 - 1.02)                  | 0.96 (0.91 - 1.01) | 1.10 (0.95 - 1.30) |
| 202102 | < 1 years | -70 (-152 - 12)        | -66 (-148 - 17)   | -5 (-26 - 17)  | 0.95 (0.91 - 1.01)                  | 0.95 (0.90 - 1.01) | 0.96 (0.82 - 1.17) |
| 202103 | < 1 years | -58 (-140 - 23)        | -78 (-160 - 5)    | 19 (-2 - 41)   | 0.97 (0.92 - 1.01)                  | 0.95 (0.90 - 1.00) | 1.14 (0.99 - 1.36) |
| 202104 | < 1 years | -10 (-91 - 71)         | -19 (-101 - 63)   | 9 (-12 - 30)   | 0.99 (0.95 - 1.04)                  | 0.99 (0.94 - 1.04) | 1.07 (0.92 - 1.27) |
| 202105 | < 1 years | -9 (-93 - 74)          | -14 (-99 - 71)    | 4 (-17 - 26)   | 0.99 (0.95 - 1.05)                  | 0.99 (0.94 - 1.05) | 1.03 (0.89 - 1.23) |
| 202106 | < 1 years | -53 (-134 - 28)        | -60 (-142 - 22)   | 7 (-14 - 28)   | 0.97 (0.92 - 1.02)                  | 0.96 (0.91 - 1.02) | 1.05 (0.91 - 1.26) |
| 202107 | < 1 years | -30 (-111 - 50)        | -34 (-116 - 48)   | 3 (-18 - 25)   | 0.98 (0.94 - 1.03)                  | 0.98 (0.93 - 1.03) | 1.03 (0.89 - 1.22) |
| 202108 | < 1 years | -16 (-98 - 66)         | -39 (-122 - 44)   | 22 (1 - 44)    | 0.99 (0.95 - 1.04)                  | 0.98 (0.93 - 1.03) | 1.17 (1.01 - 1.39) |
| 202109 | < 1 years | 57 (-24 - 138)         | 16 (-66 - 98)     | 41 (20 - 62)   | 1.03 (0.99 - 1.09)                  | 1.01 (0.96 - 1.07) | 1.31 (1.13 - 1.57) |
| 202110 | < 1 years | -1 (-83 - 81)          | 0 (-83 - 83)      | -2 (-23 - 20)  | 1.00 (0.95 - 1.05)                  | 1.00 (0.95 - 1.06) | 0.99 (0.85 - 1.18) |
| 202111 | < 1 years | -74 (-155 - 8)         | -53 (-136 - 30)   | -21 (-43 - 0)  | 0.96 (0.91 - 1.00)                  | 0.97 (0.92 - 1.02) | 0.84 (0.72 - 1.00) |
| 202112 | < 1 years | 2 (-79 - 82)           | -5 (-87 - 77)     | 6 (-15 - 27)   | 1.00 (0.96 - 1.05)                  | 1.00 (0.95 - 1.05) | 1.05 (0.91 - 1.24) |
| 202201 | < 1 years | -54 (-136 - 27)        | -60 (-143 - 23)   | 5 (-16 - 27)   | 0.97 (0.92 - 1.02)                  | 0.96 (0.91 - 1.02) | 1.04 (0.90 - 1.24) |
| 202202 | < 1 years | -56 (-138 - 26)        | -66 (-149 - 18)   | 9 (-12 - 31)   | 0.96 (0.92 - 1.02)                  | 0.95 (0.90 - 1.01) | 1.08 (0.92 - 1.31) |

## Supplemental Table 4

| Month  | Age group | Excess Deaths (95% CI) |               |                 | Ratio of Observed/Expected (95% CI) |                    |                    |
|--------|-----------|------------------------|---------------|-----------------|-------------------------------------|--------------------|--------------------|
|        |           | All Causes             | Medical       | External        | All Causes                          | Medical            | External           |
| 202003 | 1-4 years | 52 (16 - 89)           | 34 (18 - 50)  | 18 (-7 - 43)    | 1.19 (1.05 - 1.37)                  | 1.40 (1.18 - 1.73) | 1.10 (0.97 - 1.26) |
| 202004 | 1-4 years | -33 (-69 - 3)          | 8 (-7 - 23)   | -40 (-65 - -16) | 0.88 (0.78 - 1.01)                  | 1.06 (0.95 - 1.21) | 0.74 (0.64 - 0.88) |
| 202005 | 1-4 years | -29 (-66 - 8)          | -9 (-25 - 6)  | -20 (-45 - 6)   | 0.92 (0.83 - 1.03)                  | 0.94 (0.86 - 1.05) | 0.90 (0.79 - 1.03) |
| 202006 | 1-4 years | -5 (-42 - 32)          | 9 (-7 - 24)   | -14 (-39 - 12)  | 0.98 (0.88 - 1.12)                  | 1.06 (0.96 - 1.17) | 0.91 (0.79 - 1.09) |
| 202007 | 1-4 years | 18 (-18 - 54)          | 40 (24 - 55)  | -22 (-47 - 3)   | 1.05 (0.95 - 1.18)                  | 1.22 (1.12 - 1.33) | 0.85 (0.73 - 1.02) |
| 202008 | 1-4 years | -40 (-77 - -3)         | -7 (-22 - 9)  | -33 (-59 - -8)  | 0.87 (0.78 - 0.99)                  | 0.96 (0.87 - 1.06) | 0.79 (0.68 - 0.94) |
| 202009 | 1-4 years | -15 (-52 - 21)         | 9 (-6 - 24)   | -25 (-49 - 0)   | 0.94 (0.84 - 1.09)                  | 1.07 (0.96 - 1.22) | 0.84 (0.72 - 1.00) |
| 202010 | 1-4 years | 11 (-26 - 48)          | 14 (-2 - 30)  | -3 (-29 - 22)   | 1.04 (0.92 - 1.21)                  | 1.14 (0.99 - 1.34) | 0.98 (0.85 - 1.16) |
| 202011 | 1-4 years | -19 (-56 - 17)         | 21 (5 - 36)   | -40 (-65 - -15) | 0.93 (0.82 - 1.07)                  | 1.23 (1.05 - 1.49) | 0.79 (0.69 - 0.91) |
| 202012 | 1-4 years | -56 (-94 - -19)        | -7 (-22 - 9)  | -49 (-75 - -24) | 0.82 (0.73 - 0.93)                  | 0.93 (0.81 - 1.10) | 0.77 (0.69 - 0.87) |
| 202101 | 1-4 years | -46 (-83 - -10)        | 13 (-3 - 28)  | -59 (-84 - -34) | 0.85 (0.77 - 0.96)                  | 1.13 (0.98 - 1.34) | 0.73 (0.66 - 0.82) |
| 202102 | 1-4 years | -34 (-71 - 3)          | 30 (15 - 46)  | -64 (-90 - -39) | 0.89 (0.79 - 1.01)                  | 1.33 (1.14 - 1.60) | 0.69 (0.61 - 0.78) |
| 202103 | 1-4 years | -31 (-67 - 6)          | 19 (4 - 35)   | -50 (-75 - -25) | 0.90 (0.80 - 1.02)                  | 1.19 (1.04 - 1.40) | 0.74 (0.66 - 0.85) |
| 202104 | 1-4 years | 6 (-30 - 42)           | 12 (-4 - 27)  | -5 (-30 - 19)   | 1.02 (0.91 - 1.15)                  | 1.08 (0.97 - 1.21) | 0.97 (0.85 - 1.13) |
| 202105 | 1-4 years | -16 (-53 - 22)         | 0 (-16 - 16)  | -16 (-41 - 10)  | 0.96 (0.87 - 1.07)                  | 1.00 (0.92 - 1.10) | 0.92 (0.81 - 1.06) |
| 202106 | 1-4 years | -3 (-39 - 34)          | 0 (-15 - 16)  | -3 (-28 - 22)   | 0.99 (0.90 - 1.11)                  | 1.00 (0.92 - 1.10) | 0.98 (0.85 - 1.16) |
| 202107 | 1-4 years | 5 (-31 - 42)           | -8 (-24 - 7)  | 14 (-11 - 38)   | 1.02 (0.92 - 1.13)                  | 0.96 (0.89 - 1.04) | 1.10 (0.93 - 1.33) |
| 202108 | 1-4 years | 2 (-34 - 38)           | 4 (-11 - 20)  | -2 (-27 - 23)   | 1.01 (0.91 - 1.13)                  | 1.02 (0.94 - 1.12) | 0.99 (0.85 - 1.17) |
| 202109 | 1-4 years | 41 (5 - 77)            | -9 (-24 - 6)  | 50 (25 - 75)    | 1.14 (1.01 - 1.30)                  | 0.94 (0.85 - 1.05) | 1.33 (1.14 - 1.59) |
| 202110 | 1-4 years | 34 (-3 - 70)           | 20 (4 - 36)   | 14 (-11 - 39)   | 1.12 (0.99 - 1.28)                  | 1.16 (1.03 - 1.33) | 1.08 (0.94 - 1.28) |
| 202111 | 1-4 years | 27 (-9 - 64)           | 4 (-12 - 20)  | 23 (-2 - 48)    | 1.10 (0.97 - 1.26)                  | 1.04 (0.90 - 1.24) | 1.13 (0.99 - 1.30) |
| 202112 | 1-4 years | -3 (-39 - 33)          | -13 (-29 - 2) | 10 (-14 - 35)   | 0.99 (0.90 - 1.11)                  | 0.89 (0.79 - 1.02) | 1.05 (0.94 - 1.18) |
| 202201 | 1-4 years | -25 (-62 - 12)         | -6 (-21 - 10) | -20 (-45 - 6)   | 0.92 (0.83 - 1.04)                  | 0.95 (0.83 - 1.11) | 0.91 (0.82 - 1.03) |
| 202202 | 1-4 years | -23 (-60 - 13)         | 3 (-13 - 18)  | -26 (-51 - -1)  | 0.93 (0.83 - 1.05)                  | 1.03 (0.89 - 1.21) | 0.88 (0.78 - 0.99) |



### Supplemental Table 5

| Month  | Age group | Excess Deaths (95% CI) |                |                 | Ratio of Observed/Expected (95% CI) |                    |                    |
|--------|-----------|------------------------|----------------|-----------------|-------------------------------------|--------------------|--------------------|
|        |           | All Causes             | Medical        | External        | All Causes                          | Medical            | External           |
| 202003 | 5-9 years | -48 (-70 - -25)        | -15 (-29 - -1) | -33 (-50 - -15) | 0.78 (0.71 - 0.87)                  | 0.81 (0.68 - 0.99) | 0.77 (0.69 - 0.88) |
| 202004 | 5-9 years | -16 (-38 - 6)          | 2 (-12 - 16)   | -18 (-35 - 0)   | 0.91 (0.81 - 1.04)                  | 1.03 (0.85 - 1.31) | 0.84 (0.73 - 1.00) |
| 202005 | 5-9 years | -3 (-26 - 19)          | 1 (-14 - 15)   | -4 (-22 - 14)   | 0.98 (0.88 - 1.11)                  | 1.01 (0.86 - 1.23) | 0.96 (0.84 - 1.14) |
| 202006 | 5-9 years | 23 (1 - 46)            | 10 (-5 - 24)   | 14 (-4 - 32)    | 1.12 (1.00 - 1.26)                  | 1.09 (0.96 - 1.26) | 1.14 (0.96 - 1.41) |
| 202007 | 5-9 years | -1 (-23 - 21)          | 1 (-13 - 15)   | -2 (-20 - 15)   | 1.00 (0.91 - 1.11)                  | 1.01 (0.90 - 1.15) | 0.98 (0.84 - 1.17) |
| 202008 | 5-9 years | 3 (-20 - 25)           | 2 (-12 - 16)   | 1 (-17 - 19)    | 1.01 (0.91 - 1.15)                  | 1.02 (0.87 - 1.24) | 1.01 (0.86 - 1.21) |
| 202009 | 5-9 years | -6 (-29 - 16)          | 10 (-5 - 24)   | -16 (-34 - 2)   | 0.96 (0.85 - 1.11)                  | 1.14 (0.94 - 1.43) | 0.85 (0.72 - 1.02) |
| 202010 | 5-9 years | 4 (-19 - 27)           | 24 (9 - 38)    | -20 (-38 - -2)  | 1.02 (0.91 - 1.17)                  | 1.40 (1.13 - 1.86) | 0.84 (0.73 - 0.98) |
| 202011 | 5-9 years | -4 (-27 - 19)          | -5 (-19 - 9)   | 1 (-17 - 19)    | 0.98 (0.87 - 1.12)                  | 0.92 (0.75 - 1.19) | 1.01 (0.87 - 1.20) |
| 202012 | 5-9 years | -55 (-78 - -32)        | -5 (-20 - 9)   | -50 (-68 - -32) | 0.73 (0.66 - 0.82)                  | 0.92 (0.76 - 1.17) | 0.64 (0.57 - 0.74) |
| 202101 | 5-9 years | -24 (-46 - -2)         | 12 (-2 - 26)   | -36 (-54 - -19) | 0.88 (0.79 - 0.99)                  | 1.19 (0.97 - 1.54) | 0.74 (0.66 - 0.85) |
| 202102 | 5-9 years | -6 (-29 - 16)          | 17 (3 - 32)    | -24 (-42 - -6)  | 0.96 (0.85 - 1.11)                  | 1.32 (1.04 - 1.78) | 0.80 (0.69 - 0.94) |
| 202103 | 5-9 years | -29 (-51 - -6)         | 13 (-1 - 27)   | -41 (-59 - -24) | 0.87 (0.79 - 0.97)                  | 1.17 (0.98 - 1.44) | 0.71 (0.63 - 0.81) |
| 202104 | 5-9 years | 24 (2 - 47)            | 17 (3 - 32)    | 7 (-11 - 24)    | 1.14 (1.01 - 1.31)                  | 1.26 (1.04 - 1.59) | 1.06 (0.91 - 1.28) |
| 202105 | 5-9 years | 14 (-9 - 37)           | 18 (3 - 32)    | -4 (-22 - 14)   | 1.07 (0.96 - 1.21)                  | 1.22 (1.03 - 1.48) | 0.97 (0.84 - 1.14) |
| 202106 | 5-9 years | 1 (-21 - 24)           | 2 (-12 - 16)   | -1 (-19 - 17)   | 1.01 (0.91 - 1.13)                  | 1.02 (0.90 - 1.17) | 0.99 (0.84 - 1.20) |
| 202107 | 5-9 years | 0 (-23 - 22)           | 9 (-5 - 23)    | -9 (-27 - 8)    | 1.00 (0.91 - 1.11)                  | 1.08 (0.96 - 1.23) | 0.92 (0.79 - 1.09) |
| 202108 | 5-9 years | 47 (25 - 70)           | 18 (4 - 32)    | 29 (12 - 47)    | 1.26 (1.12 - 1.44)                  | 1.22 (1.04 - 1.49) | 1.30 (1.10 - 1.58) |
| 202109 | 5-9 years | 13 (-9 - 36)           | 2 (-12 - 16)   | 11 (-6 - 29)    | 1.08 (0.95 - 1.24)                  | 1.03 (0.85 - 1.28) | 1.11 (0.95 - 1.35) |
| 202110 | 5-9 years | -2 (-25 - 21)          | 15 (1 - 30)    | -18 (-35 - 0)   | 0.99 (0.88 - 1.13)                  | 1.25 (1.01 - 1.63) | 0.85 (0.74 - 1.00) |
| 202111 | 5-9 years | 30 (7 - 53)            | 17 (2 - 31)    | 13 (-5 - 31)    | 1.17 (1.03 - 1.33)                  | 1.26 (1.03 - 1.61) | 1.11 (0.97 - 1.31) |
| 202112 | 5-9 years | 15 (-7 - 37)           | 21 (7 - 35)    | -6 (-23 - 11)   | 1.07 (0.97 - 1.19)                  | 1.30 (1.08 - 1.64) | 0.96 (0.86 - 1.09) |
| 202201 | 5-9 years | -9 (-31 - 14)          | 5 (-9 - 19)    | -14 (-31 - 4)   | 0.96 (0.86 - 1.08)                  | 1.08 (0.87 - 1.43) | 0.90 (0.80 - 1.04) |
| 202202 | 5-9 years | 19 (-4 - 41)           | 16 (1 - 30)    | 3 (-15 - 21)    | 1.11 (0.98 - 1.28)                  | 1.29 (1.02 - 1.76) | 1.03 (0.89 - 1.21) |

# Supplemental Figure 4

## Causes of Death, Ages <1 Years

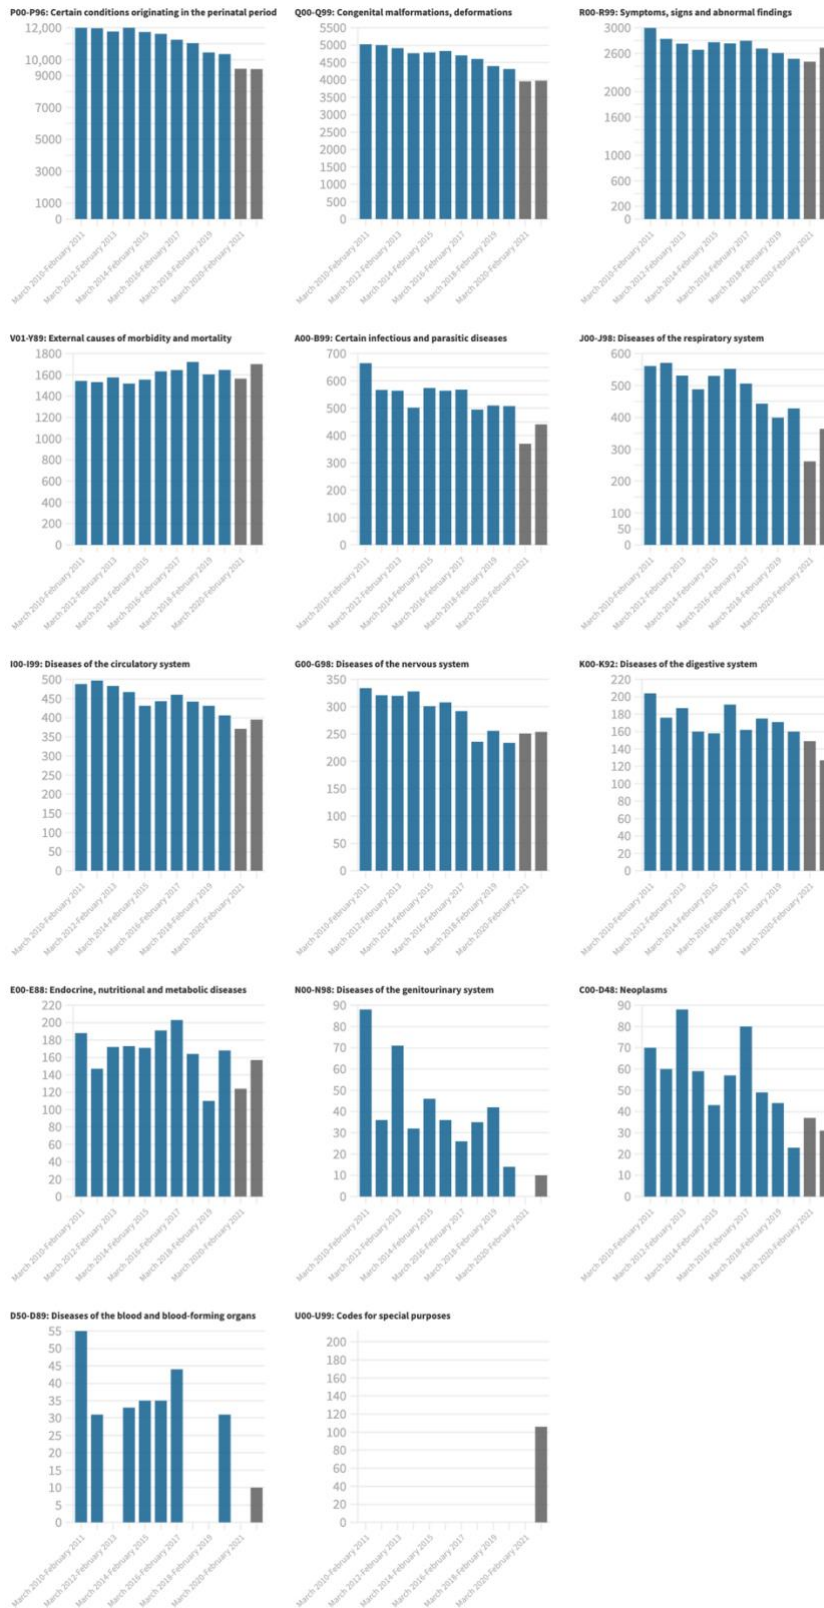

Suppression may occur for chapters with low death counts.  
 Note that U00-U99 includes deaths from COVID-19.

# Supplemental Figure 5

## Causes of Death, Ages 1-9 Years

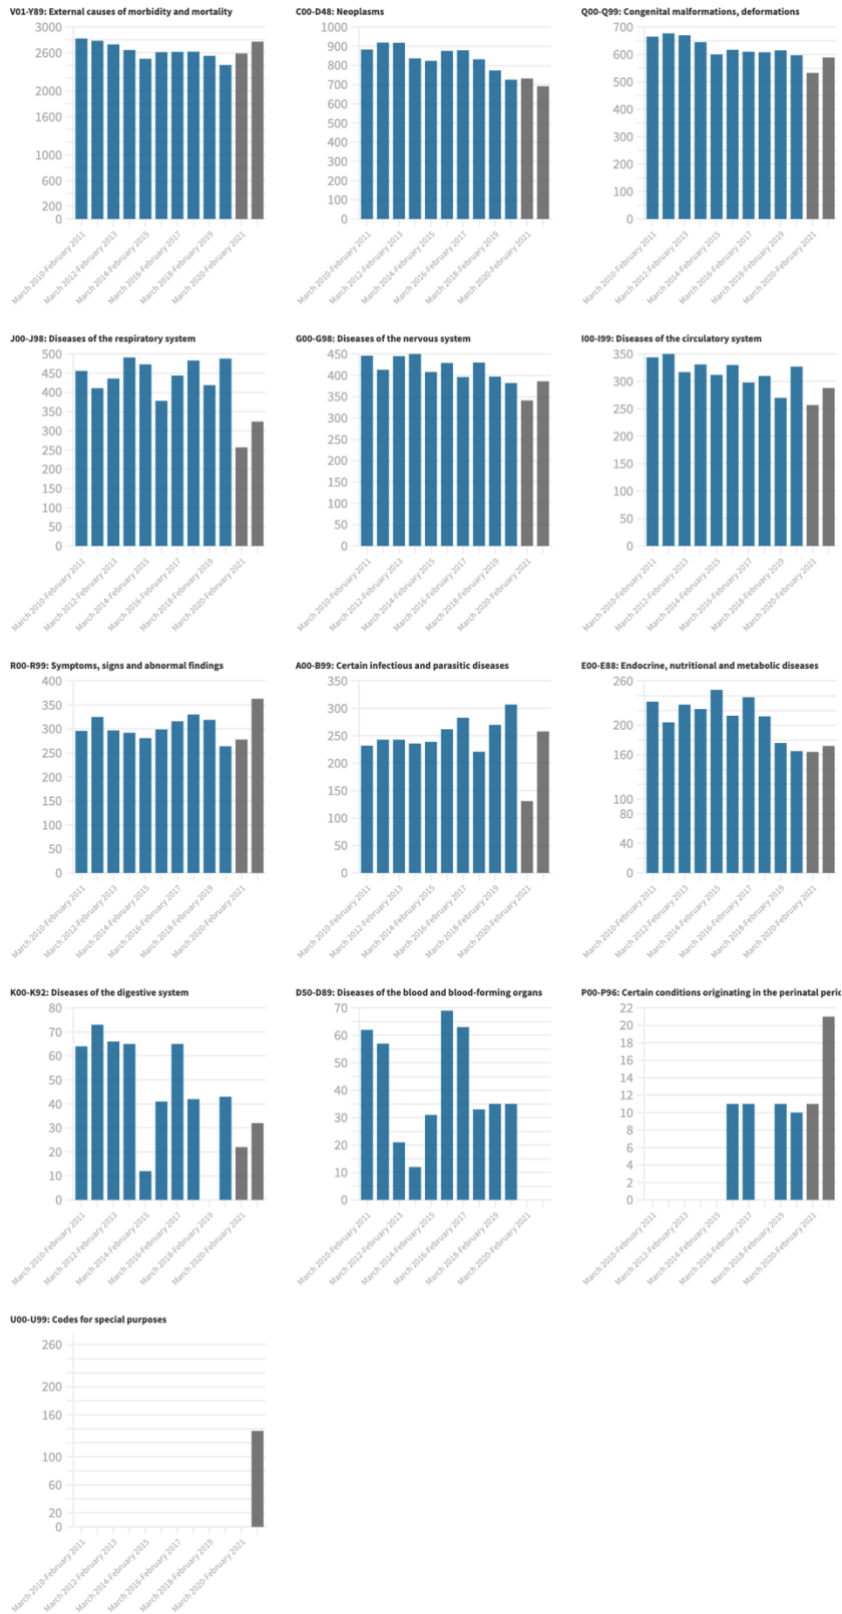

Suppression may occur for chapters with low death counts.  
 Note that U00-U99 includes deaths from COVID-19.

## Supplemental Figure 6

### External Deaths Ages 0-9 by ICD Sub-Chapter

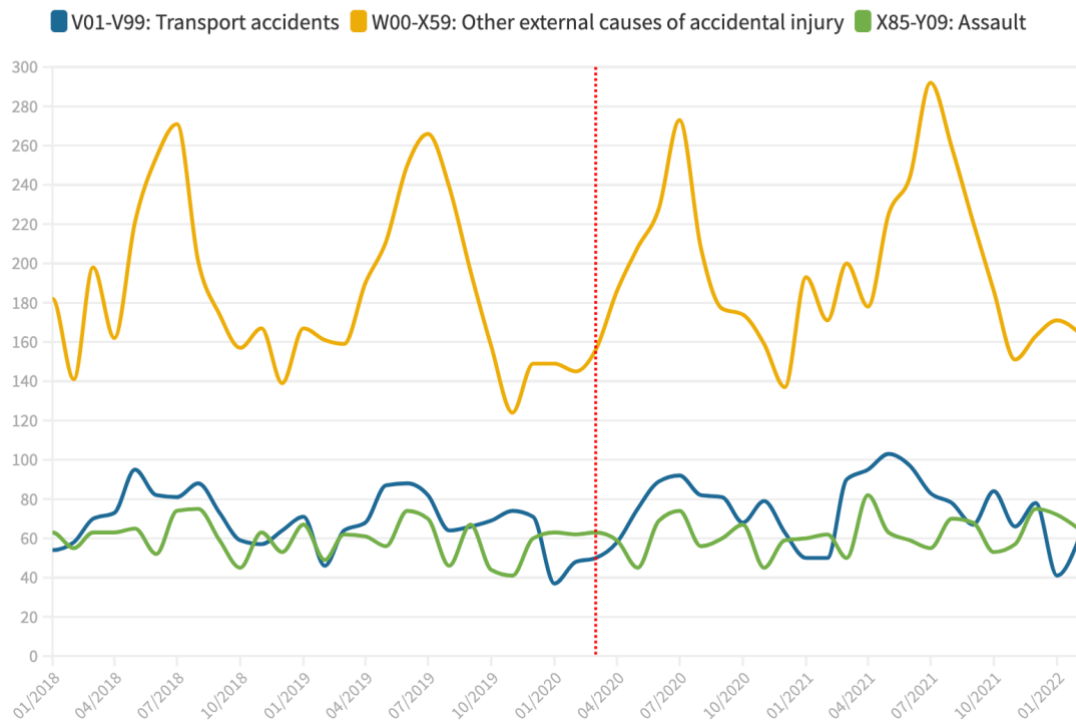

Supplement: Supplementary file [file media-1.pdf]
